# Supplementary material for: Single transition metal atoms anchored on WSe 2 /WS 2 heterostructures as efficient bifunctional electrocatalysts for the OER/ORR
Source: Royal Society of Chemistry journal article supplement (doi:10.1039/d5cp03201f), 2025-11-25
Supplement: d5cp03201f1.zip [file Supplementary Information.pdf › Supporting Information/Supporting Information1025/Supplementary Information.pdf]

# Single transition metal atoms anchored on WSe<sub>2</sub>/WS<sub>2</sub> heterostructures as efficient bifunctional electrocatalysts for OER/ORR reactions

Kai Zhang<sup>a†</sup>, Jianjun Fang<sup>a†</sup>, Chenkun Li<sup>a</sup>, Tongmeng Xing<sup>a</sup>, Qiuyan

Xiang<sup>a</sup>, Xianfang Yue<sup>b</sup>, Breno R. L. Galvão<sup>a,c,\*</sup> and Jing Li<sup>a†</sup>

<sup>a</sup>*Shandong Key Laboratory of Medical Physics and Image Processing,*

*Shandong Engineering Research Center for Medical Physical Imaging Technology,*

*School of Physics and Physical Engineering, Qufu Normal University, Qufu 273165, Shandong, China*

<sup>b</sup>*Department of Physics and Information Engineering, Jining University, Qufu 273155, China and*

<sup>c</sup>*Centro Federal de Educação Tecnológica de Minas Gerais, CEFET-MG,*

*Av. Amazonas 5253, 30421-169 Belo Horizonte, Minas Gerais, Brazil*

(Dated: October 25, 2025)

---

\* Corresponding author: [brenogalvao@gmail.com](mailto:brenogalvao@gmail.com)

† Corresponding author: [jli@qfnu.edu.cn](mailto:jli@qfnu.edu.cn)

TABLE S1. Calculated binding energies of various TM single atoms at adsorption sites on the WSe<sub>2</sub>/WS<sub>2</sub> heterostructure. The most stable sites are marked in bold. All values are in eV.

| Systems                              | T <sub>Se</sub> site | T <sub>Se-S</sub> site | T <sub>S</sub> site | H <sub>Se</sub> site | H <sub>Se-S</sub> site | H <sub>S</sub> site |
|--------------------------------------|----------------------|------------------------|---------------------|----------------------|------------------------|---------------------|
| Ti@WSe <sub>2</sub> /WS <sub>2</sub> | -1.77                | -2.20                  | -1.93               | -1.35                | -2.20                  | -1.98               |
| V@WSe <sub>2</sub> /WS <sub>2</sub>  | -1.64                | -2.09                  | -1.77               | -1.04                | -2.09                  | -1.56               |
| Cr@WSe <sub>2</sub> /WS <sub>2</sub> | -0.69                | -0.90                  | -0.77               | -0.60                | -0.71                  | -0.72               |
| Mn@WSe <sub>2</sub> /WS <sub>2</sub> | -0.39                | -0.71                  | -0.51               | -0.27                | -0.40                  | -0.57               |
| Fe@WSe <sub>2</sub> /WS <sub>2</sub> | -1.18                | -1.92                  | -1.69               | -0.79                | -1.48                  | -1.46               |
| Co@WSe <sub>2</sub> /WS <sub>2</sub> | -2.25                | -2.69                  | -2.46               | -2.01                | -2.23                  | -2.36               |
| Ni@WSe <sub>2</sub> /WS <sub>2</sub> | -3.13                | -3.53                  | -3.29               | -2.68                | -3.02                  | -3.15               |
| Cu@WSe <sub>2</sub> /WS <sub>2</sub> | -0.91                | -0.97                  | -0.97               | -0.84                | -0.92                  | -0.90               |
| Zr@WSe <sub>2</sub> /WS <sub>2</sub> | -2.00                | -2.43                  | -2.15               | -1.56                | -2.43                  | -2.40               |
| Nb@WSe <sub>2</sub> /WS <sub>2</sub> | -1.76                | -2.23                  | -1.94               | -1.21                | -2.23                  | -1.55               |
| Mo@WSe <sub>2</sub> /WS <sub>2</sub> | -0.56                | -0.89                  | -0.61               | -0.51                | -0.58                  | -0.58               |
| Ru@WSe <sub>2</sub> /WS <sub>2</sub> | -2.76                | -3.15                  | -2.93               | -1.88                | -2.06                  | -2.39               |
| Rh@WSe <sub>2</sub> /WS <sub>2</sub> | -2.80                | -3.08                  | -2.92               | -2.11                | -3.08                  | -2.30               |
| Pd@WSe <sub>2</sub> /WS <sub>2</sub> | -1.78                | -1.99                  | -1.85               | -1.55                | -1.99                  | -1.62               |
| Ag@WSe <sub>2</sub> /WS <sub>2</sub> | -0.36                | -0.33                  | -0.36               | -0.40                | -0.40                  | -0.37               |
| Ta@WSe <sub>2</sub> /WS <sub>2</sub> | -1.90                | -2.34                  | -2.07               | -1.27                | -2.34                  | -1.52               |
| W@WSe <sub>2</sub> /WS <sub>2</sub>  | -1.12                | -1.50                  | -1.26               | -0.86                | -1.03                  | -1.07               |
| Re@WSe <sub>2</sub> /WS <sub>2</sub> | -0.56                | -1.21                  | -0.97               | -0.17                | -1.21                  | -0.73               |
| Os@WSe <sub>2</sub> /WS <sub>2</sub> | -2.16                | -2.54                  | -2.34               | -0.87                | -2.54                  | -2.03               |
| Ir@WSe <sub>2</sub> /WS <sub>2</sub> | -2.66                | -2.94                  | -2.80               | -1.64                | -2.94                  | -1.86               |
| Pt@WSe <sub>2</sub> /WS <sub>2</sub> | -2.48                | -2.68                  | -2.56               | -2.01                | -2.68                  | -2.09               |
| Au@WSe <sub>2</sub> /WS <sub>2</sub> | -0.54                | -0.64                  | 0.58                | -0.64                | -0.58                  | -0.53               |

TABLE S2. The bond lengths between TM atoms and neighboring Se/S atoms ( $d_{TM-Se_1}$ ,  $d_{TM-Se_2}$  and  $d_{TM-S}$  in Å) and the charge transfer between TM atoms and neighboring Se/S atoms ( $Q_{TM}$ ,  $Q_{Se_1}$ ,  $Q_{Se_2}$  and  $Q_S$  in e).

| Systems                              | $d_{TM-Se_1}$ | $d_{TM-Se_2}$ | $d_{TM-S}$ | $Q_{TM}$ | $Q_{Se_1}$ | $Q_{Se_2}$ | $Q_S$ |
|--------------------------------------|---------------|---------------|------------|----------|------------|------------|-------|
| Ti@WSe <sub>2</sub> /WS <sub>2</sub> | 2.50          | 2.50          | 2.32       | -1.02    | 1.04       | 1.01       | 1.00  |
| V@WSe <sub>2</sub> /WS <sub>2</sub>  | 2.44          | 2.44          | 2.29       | -0.90    | 0.87       | 0.84       | 0.86  |
| Fe@WSe <sub>2</sub> /WS <sub>2</sub> | 2.26          | 2.26          | 2.12       | -0.58    | 0.78       | 0.76       | 0.89  |
| Co@WSe <sub>2</sub> /WS <sub>2</sub> | 2.25          | 2.25          | 2.07       | -0.42    | 0.87       | 0.85       | 0.79  |
| Ni@WSe <sub>2</sub> /WS <sub>2</sub> | 2.24          | 2.24          | 2.09       | -0.35    | 0.92       | 0.90       | 0.75  |
| Zr@WSe <sub>2</sub> /WS <sub>2</sub> | 2.61          | 2.61          | 2.45       | -1.03    | 0.97       | 0.93       | 0.82  |
| Ru@WSe <sub>2</sub> /WS <sub>2</sub> | 2.37          | 2.37          | 2.24       | -0.51    | 0.79       | 0.77       | 0.75  |
| Rh@WSe <sub>2</sub> /WS <sub>2</sub> | 2.38          | 2.38          | 2.23       | -0.42    | 0.78       | 0.76       | 0.75  |
| Pd@WSe <sub>2</sub> /WS <sub>2</sub> | 2.46          | 2.46          | 2.30       | -0.19    | 0.51       | 0.48       | 0.64  |
| Ir@WSe <sub>2</sub> /WS <sub>2</sub> | 2.37          | 2.37          | 2.22       | -0.38    | 0.58       | 0.56       | 0.63  |
| Pt@WSe <sub>2</sub> /WS <sub>2</sub> | 2.43          | 2.43          | 2.26       | -0.38    | 0.75       | 0.73       | 0.37  |

TABLE S3. The optimized structures of OH\*, O\* and OOH\* intermediates on the different TM@WSe<sub>2</sub>/WS<sub>2</sub>.

| TM | OH*                                                                                 |                                                                                     | O*                                                                                  |                                                                                      | OOH*                                                                                  |                                                                                       |
|----|-------------------------------------------------------------------------------------|-------------------------------------------------------------------------------------|-------------------------------------------------------------------------------------|--------------------------------------------------------------------------------------|---------------------------------------------------------------------------------------|---------------------------------------------------------------------------------------|
|    | Top view                                                                            | Side view                                                                           | Top view                                                                            | Side view                                                                            | Top view                                                                              | Side view                                                                             |
| Ti | 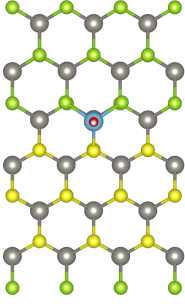   |    |    |    |    |    |
|    |    |    |    |    |    |    |
|    |   |   |   |   |   |   |
|    |  |  |  |  |  |  |
| V  |  |  |  |  |  |  |
|    |  |  |  |  |  |  |
|    |  |  |  |  |  |  |
|    |  |  |  |  |  |  |
| Fe |  |  |  |  |  |  |
|    |  |  |  |  |  |  |
|    |  |  |  |  |  |  |
|    |  |  |  |  |  |  |
| Co |  |  |  |  |  |  |
|    |  |  |  |  |  |  |
|    |  |  |  |  |  |  |
|    |  |  |  |  |  |  |
| Ni |  |  |  |  |  |  |
|    |  |  |  |  |  |  |
|    |  |  |  |  |  |  |
|    |  |  |  |  |  |  |



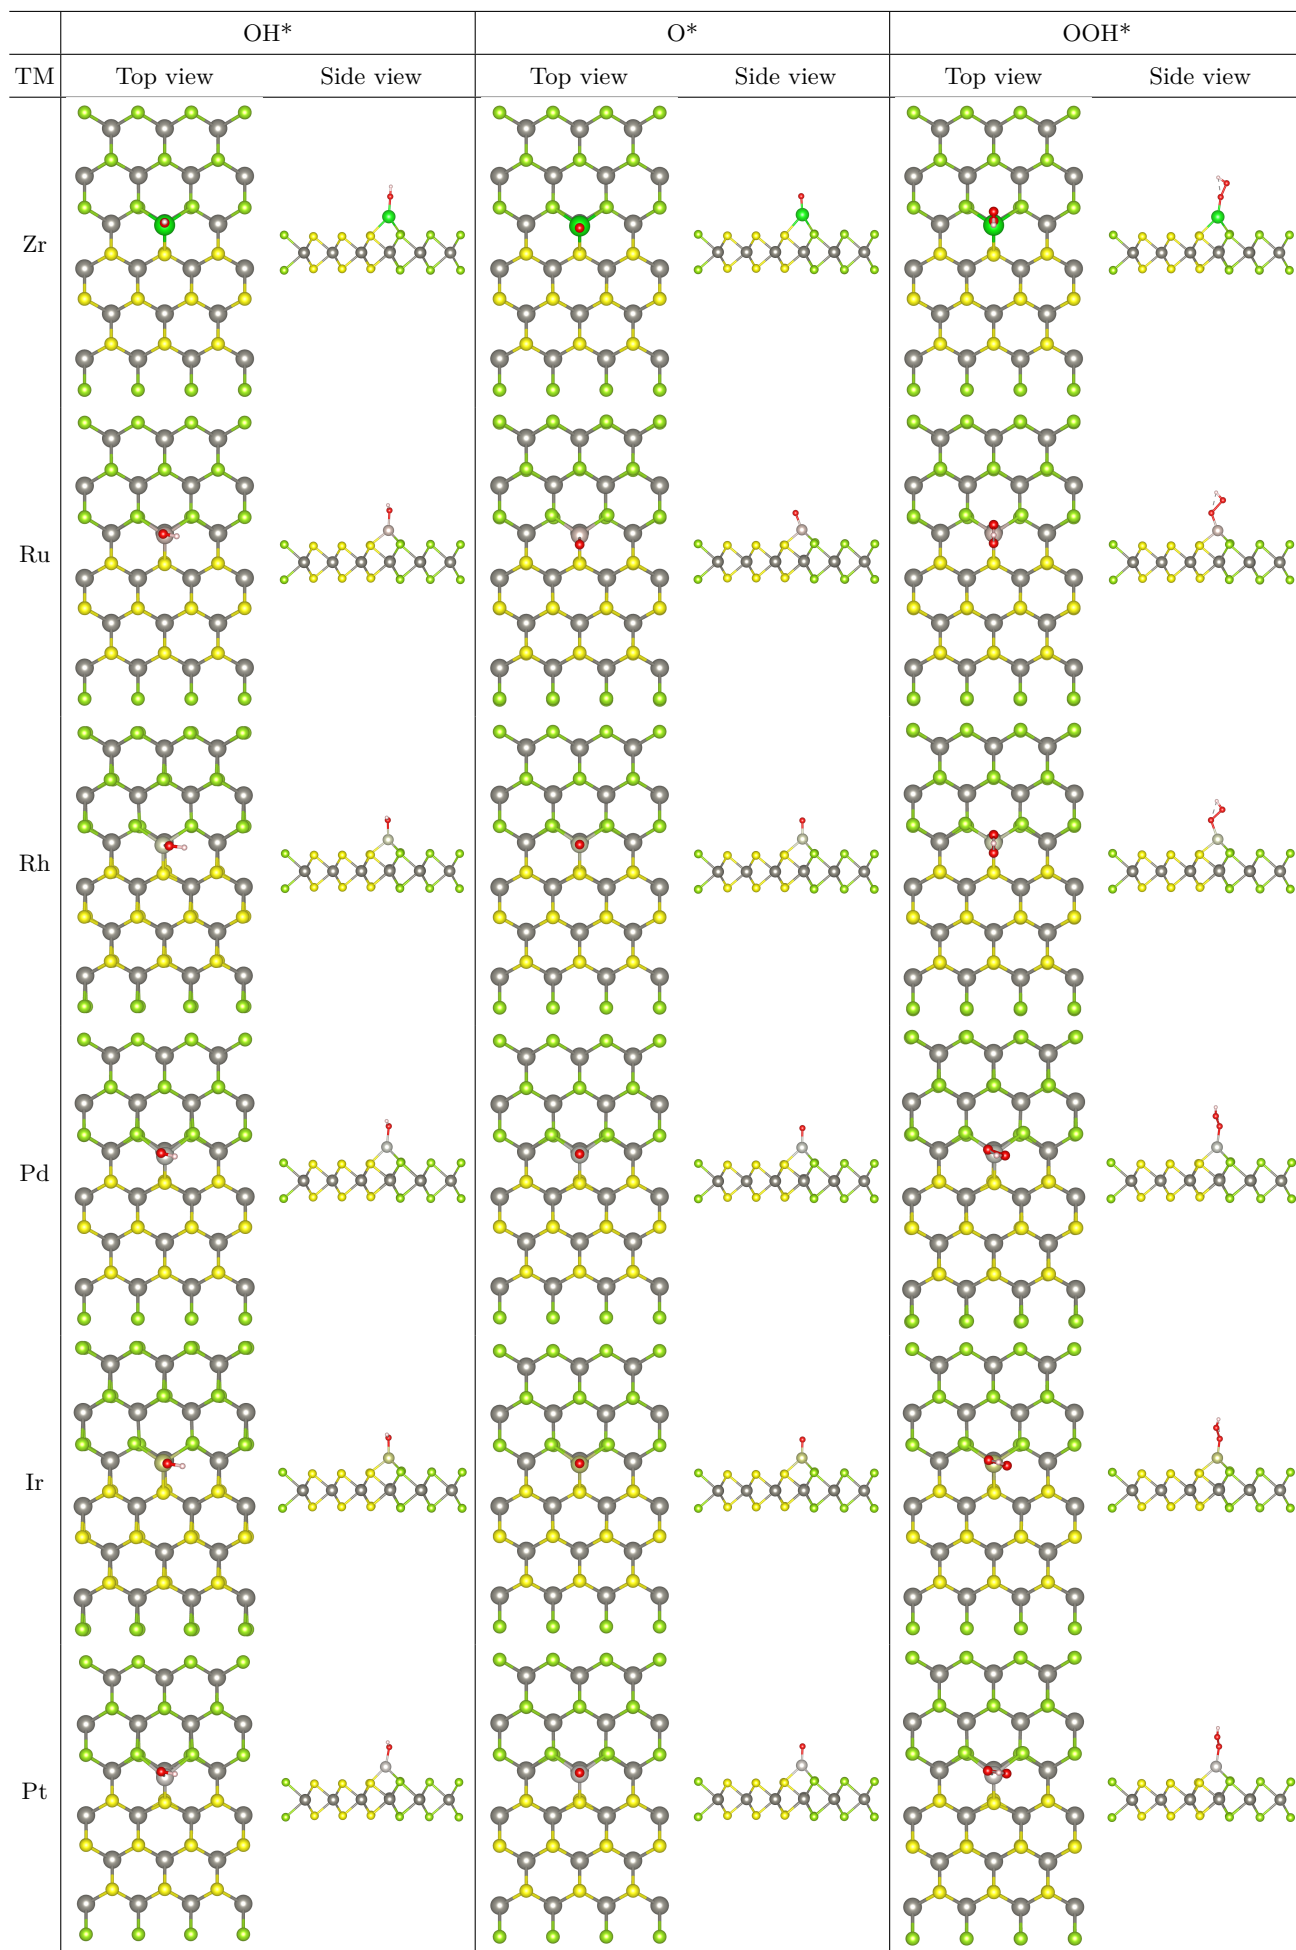

TABLE S4. The adsorption energies of  $^*OH$ ,  $^*O$  and  $^*OOH$   $\Delta G_{^*OH}$ ,  $\Delta G_{^*O}$  and  $\Delta G_{^*OOH}$ .

| Systems                              | $\Delta G_{^*OH}$ (eV) | $\Delta G_{^*O}$ (eV) | $\Delta G_{^*OOH}$ (eV) |
|--------------------------------------|------------------------|-----------------------|-------------------------|
| Ti@WSe <sub>2</sub> /WS <sub>2</sub> | -2.19                  | -2.04                 | 1.41                    |
| V@WSe <sub>2</sub> /WS <sub>2</sub>  | -1.73                  | -1.43                 | 1.95                    |
| Fe@WSe <sub>2</sub> /WS <sub>2</sub> | -0.61                  | 0.59                  | 2.69                    |
| Co@WSe <sub>2</sub> /WS <sub>2</sub> | -0.38                  | 0.76                  | 2.95                    |
| Ni@WSe <sub>2</sub> /WS <sub>2</sub> | 0.45                   | 1.83                  | 3.54                    |
| Zr@WSe <sub>2</sub> /WS <sub>2</sub> | -2.42                  | -2.30                 | 1.20                    |
| Ru@WSe <sub>2</sub> /WS <sub>2</sub> | -0.20                  | 0.09                  | 2.81                    |
| Rh@WSe <sub>2</sub> /WS <sub>2</sub> | 0.38                   | 1.34                  | 3.39                    |
| Pd@WSe <sub>2</sub> /WS <sub>2</sub> | 1.20                   | 2.84                  | 4.18                    |
| Ir@WSe <sub>2</sub> /WS <sub>2</sub> | -0.17                  | 0.37                  | 2.85                    |
| Pt@WSe <sub>2</sub> /WS <sub>2</sub> | 0.49                   | 1.70                  | 3.61                    |

TABLE S5. The four reaction steps  $\Delta G_1$ ,  $\Delta G_2$ ,  $\Delta G_3$  and  $\Delta G_4$  of the TM@WSe<sub>2</sub>/WS<sub>2</sub> system and the corresponding OER and ORR overpotentials.

| Systems                              | $\Delta G_1$ (eV) | $\Delta G_2$ (eV) | $\Delta G_3$ (eV) | $\Delta G_4$ (eV) | $\eta_{OER}$ (V) | $\eta_{ORR}$ (V) |
|--------------------------------------|-------------------|-------------------|-------------------|-------------------|------------------|------------------|
| Ti@WSe <sub>2</sub> /WS <sub>2</sub> | -2.19             | 0.15              | 3.45              | 3.51              | 2.28             | 3.42             |
| V@WSe <sub>2</sub> /WS <sub>2</sub>  | -1.37             | -0.06             | 3.38              | 2.97              | 2.15             | 2.60             |
| Fe@WSe <sub>2</sub> /WS <sub>2</sub> | -0.61             | 1.20              | 2.10              | 2.23              | 1.00             | 1.84             |
| Co@WSe <sub>2</sub> /WS <sub>2</sub> | -0.38             | 1.14              | 2.19              | 1.97              | 0.96             | 1.61             |
| Ni@WSe <sub>2</sub> /WS <sub>2</sub> | 0.45              | 1.39              | 1.71              | 1.38              | 0.48             | 0.78             |
| Zr@WSe <sub>2</sub> /WS <sub>2</sub> | -2.42             | 0.12              | 3.51              | 3.72              | 2.49             | 3.65             |
| Ru@WSe <sub>2</sub> /WS <sub>2</sub> | -0.20             | 0.29              | 2.71              | 2.11              | 1.48             | 1.43             |
| Rh@WSe <sub>2</sub> /WS <sub>2</sub> | 0.38              | 0.96              | 2.05              | 1.53              | 0.82             | 0.85             |
| Pd@WSe <sub>2</sub> /WS <sub>2</sub> | 1.20              | 1.64              | 1.34              | 0.74              | 0.41             | 0.49             |
| Ir@WSe <sub>2</sub> /WS <sub>2</sub> | -0.17             | 0.55              | 2.47              | 2.07              | 1.24             | 1.40             |
| Pt@WSe <sub>2</sub> /WS <sub>2</sub> | 0.49              | 1.20              | 1.91              | 1.31              | 0.68             | 0.74             |

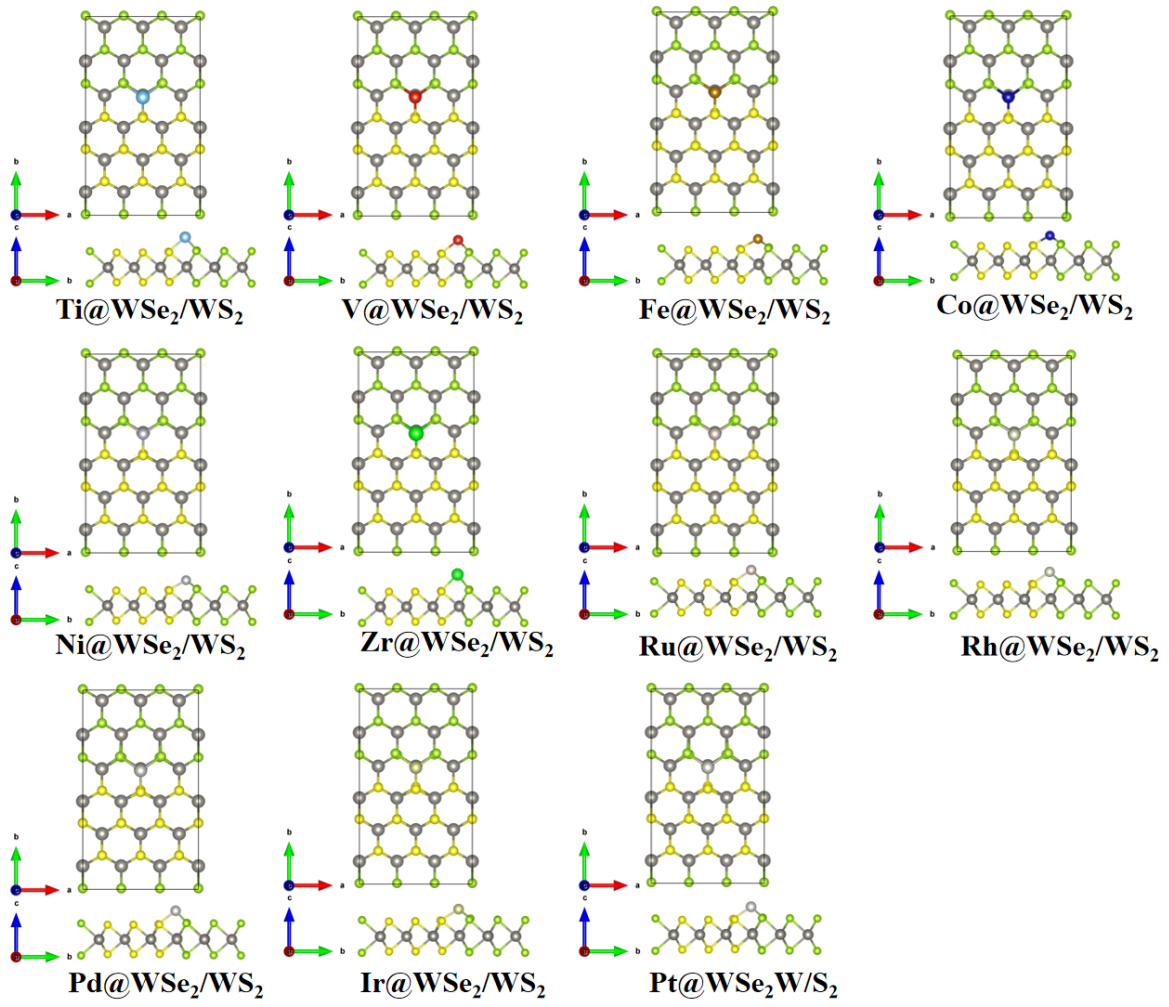

FIG. S1. The top and side views of the TM@WSe<sub>2</sub>/WS<sub>2</sub> structures.

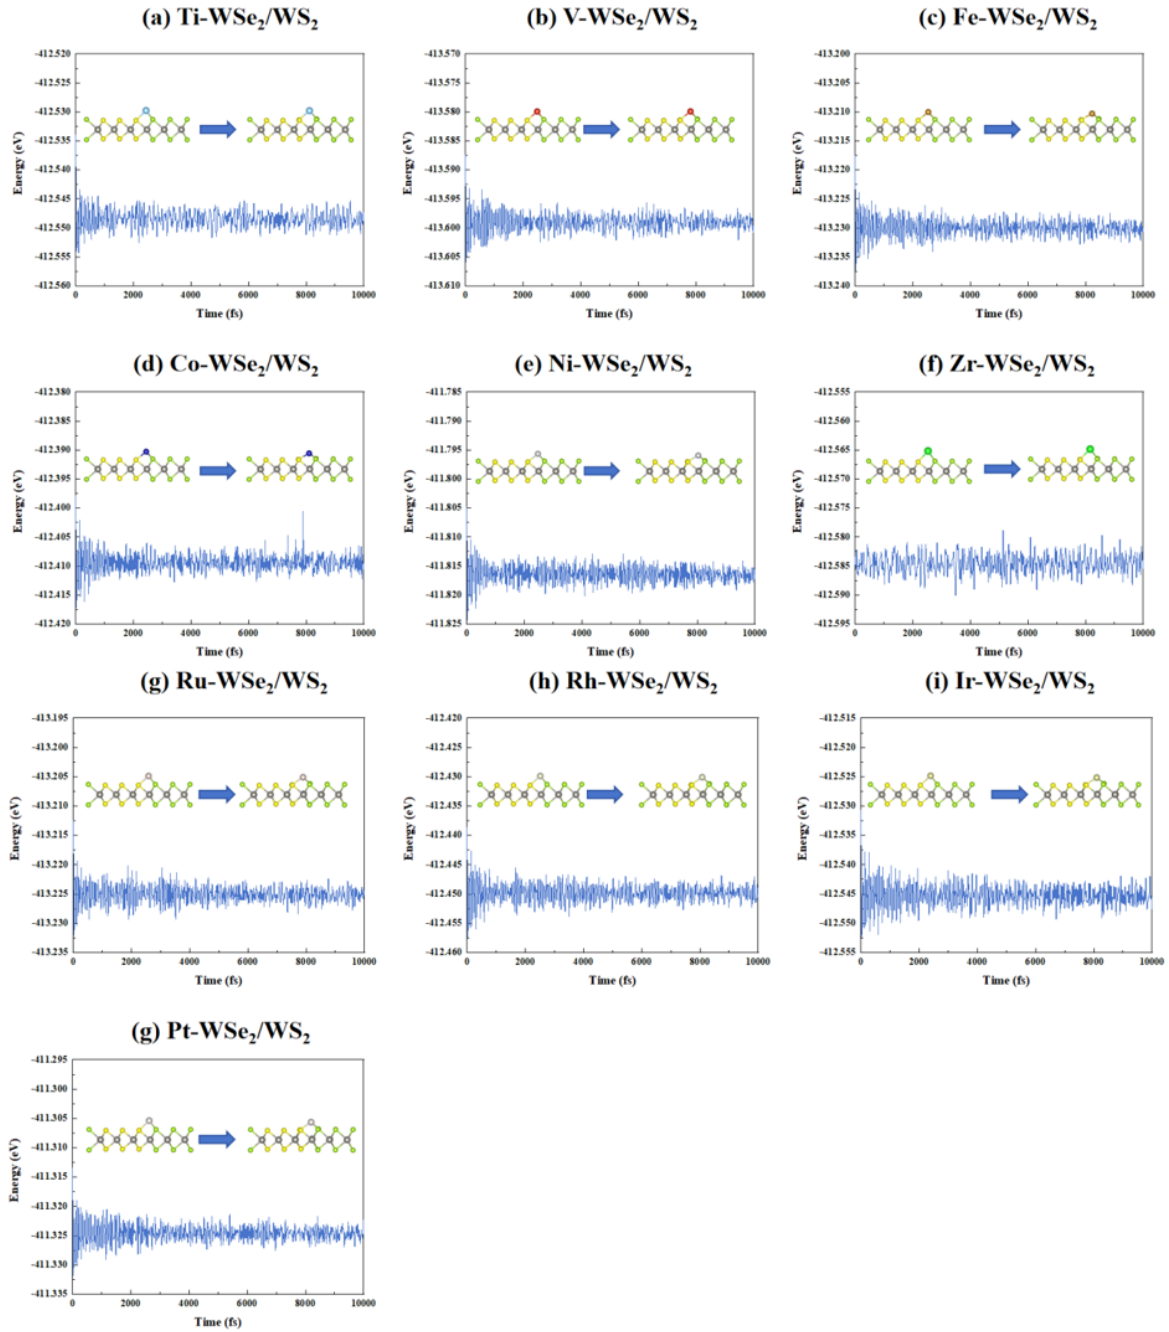

FIG. S2. Variations of the energies for Ti, V, Fe, Co, Ni, Zr, Ru, Rh, Ir, and Pt@WSe<sub>2</sub>/WS<sub>2</sub> in a 10000 fs AIMD simulation at 300 K. The inset shows the atomic structure at the beginning and end of the AIMD simulation.

(a) Nb-WSe<sub>2</sub>/WS<sub>2</sub>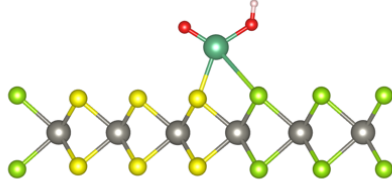(b) Ta-WSe<sub>2</sub>/WS<sub>2</sub>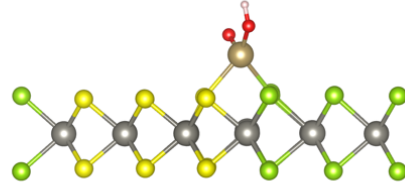(c) W-WSe<sub>2</sub>/WS<sub>2</sub>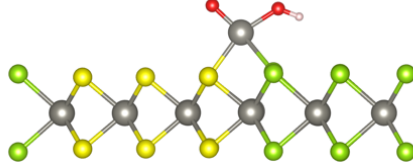(d) Os-WSe<sub>2</sub>/WS<sub>2</sub>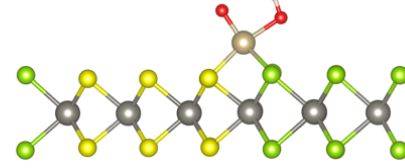

FIG. S3. Optimized structures of \*OOH adsorbed on (a) Nb@WSe<sub>2</sub>/WS<sub>2</sub>, (b) Ta@WSe<sub>2</sub>/WS<sub>2</sub>, (c) W@WSe<sub>2</sub>/WS<sub>2</sub>, and (d) Os@WSe<sub>2</sub>/WS<sub>2</sub> (stable \*OOH adsorption geometries could not be obtained).

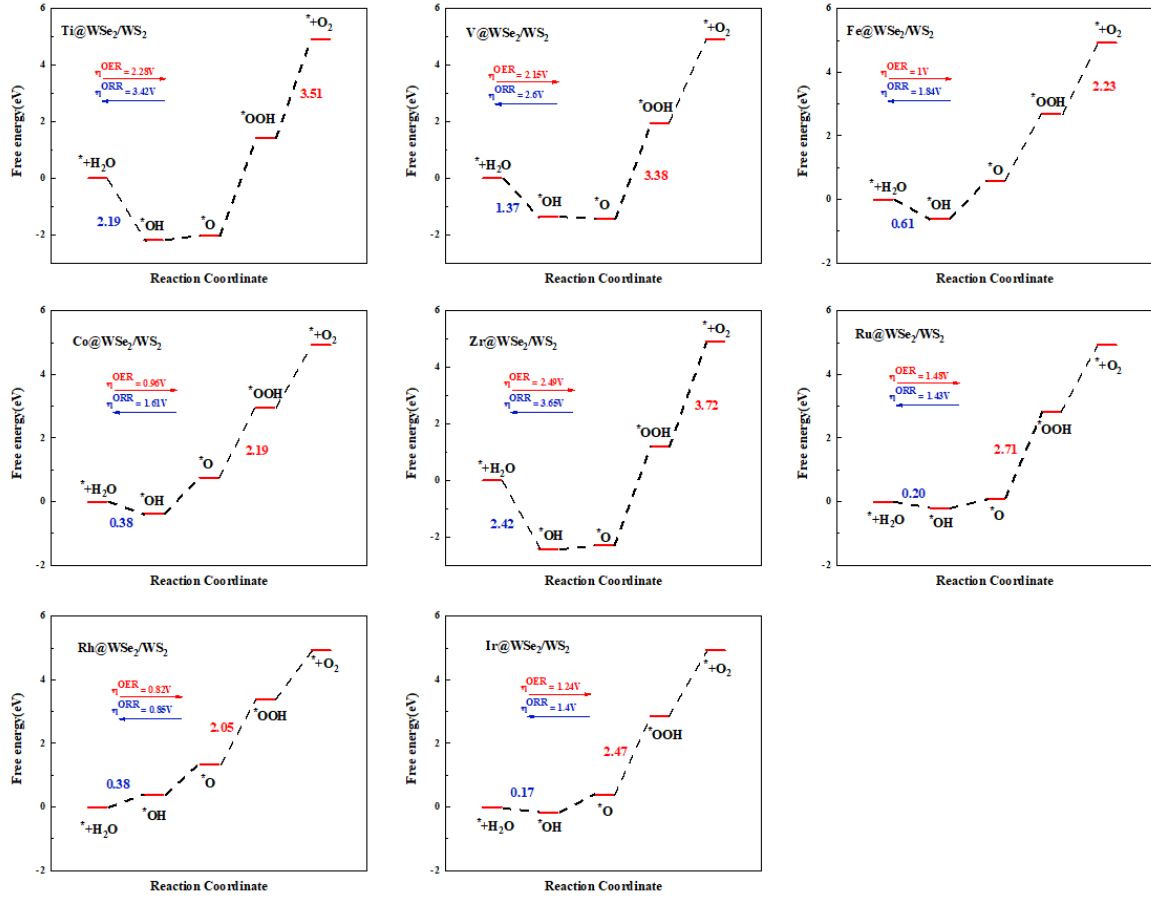

FIG. S4. Free energy diagrams for OER/ORR on TM@WSe<sub>2</sub>/WS<sub>2</sub> (TM= Ti, V, Fe, Co, Zr, Ru, Rh, and Ir)

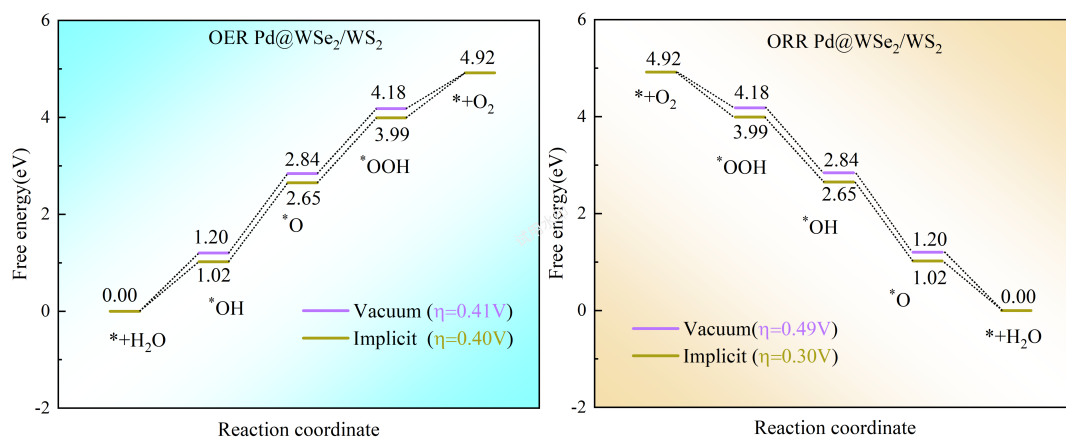

FIG. S5. -COHP between the TM (TM= Ti, V, Fe, Co, Zr, Ru, Rh, and Ir) and OH intermediates, where the Fermi energy level is set to zero.

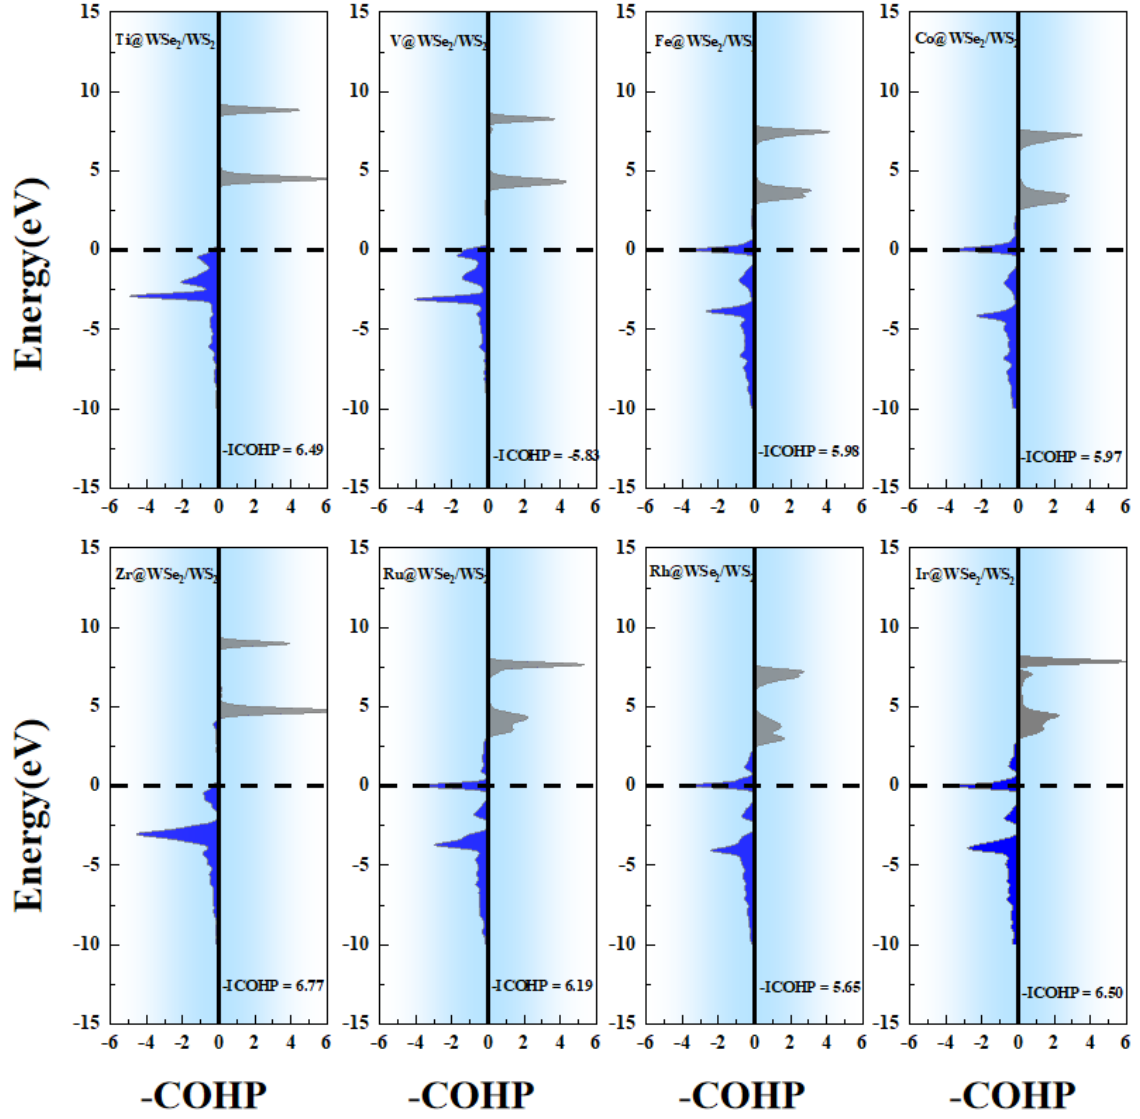

FIG. S6. The project density of states (PDOS) of d-orbital of transitional-metal. The red line denoted the d-band center of the metal atom.
